# Supplementary material for: Trial registration and selective outcome reporting in 585 clinical trials investigating drugs for prevention of postoperative nausea and vomiting
Source: PubMed Central journal article supplement (PMC8524993; doi:10.1186/s12871-021-01464-w), 2021-10-19
Supplement: 12871_2021_1464_MOESM3_ESM.pdf [file 12871_2021_1464_MOESM3_ESM.pdf]

**Supplementary File 3: Studies with registered study protocols**

| Study-ID             | Protocol number                                   | Pro-<br>/retrospective<br>registration | Risk of<br>selective<br>outcome<br>reporting bias<br>(SOR)                                     | SOR: Number<br>of major<br>discrepancies |
|----------------------|---------------------------------------------------|----------------------------------------|------------------------------------------------------------------------------------------------|------------------------------------------|
| Agarkar-2015         | CTRI/2013/02/003357                               | retrospective                          | unclear                                                                                        | -                                        |
| Alghanem-2010        | NCT00825071                                       | retrospective                          | unclear                                                                                        | -                                        |
| Altorjay-2011        | (Pro) EUCTR2005-005856-42-GB, (Retro) NCT00326248 | pro and retrospective                  | low                                                                                            | -                                        |
| Apfel-2004           | Controlled Clinical Trials 24 (2003), 736-751     | retrospective                          | unclear                                                                                        | -                                        |
| Areeruk-2016         | TCTR20151116001                                   | retrospective                          | unclear                                                                                        | -                                        |
| Bang-2016            | NCT01478165                                       | retrospective                          | unclear                                                                                        | -                                        |
| Bang-2017            | KCT0001930                                        | retrospective                          | unclear                                                                                        | -                                        |
| Bataille-2016        | NCT01876290                                       | retrospective                          | unclear                                                                                        | -                                        |
| Benevides-2013       | RBR-4bxdhb                                        | retrospective                          | unclear                                                                                        | -                                        |
| Bergese-2016         | NCT01474915                                       | retrospective                          | unclear                                                                                        | -                                        |
| Bjerregaard-2018     | EUCTR2012-004451-3                                | prospective                            | low                                                                                            | -                                        |
| Blitz-2012           | NCT00952133                                       | retrospective                          | unclear                                                                                        | -                                        |
| Choi-2016            | NCT02597907                                       | retrospective                          | unclear                                                                                        | -                                        |
| Chun-2014            | KCT0000537                                        | retrospective                          | unclear                                                                                        | -                                        |
| Corcoran-2017        | ACTRN12608000340336                               | prospective                            | unclear (either protocol or study article provides no information about the "time assessment") | -                                        |
| Cortes-Flores-2018   | NCT02305173                                       | retrospective                          | unclear                                                                                        | -                                        |
| DeOliveira-2011      | NCT01052038                                       | prospective                            | high                                                                                           | 4                                        |
| DeOliveira-2016      | NCT01451762                                       | retrospective                          | unclear                                                                                        | -                                        |
| Dewinter-2016        | EUCTR2008-004789-20                               | prospective                            | unclear (either protocol or study article provides no information about the "time assessment") | -                                        |
| Diemunsch-2007       | NCT00090246                                       | retrospective                          | unclear                                                                                        | -                                        |
| Eidi-2012            | IRCT201106154005N4                                | retrospective                          | unclear                                                                                        | -                                        |
| Fahlenkamp-2016      | EUCTR2008-004132-20, NCT00793663                  | prospective                            | high                                                                                           | 2                                        |
| Feroci-2011          | NCT00888303                                       | retrospective                          | unclear                                                                                        | -                                        |
| Gan-2007             | NCT00090155                                       | retrospective                          | unclear                                                                                        | -                                        |
| Gan-2011             | NCT00539721                                       | prospective                            | low                                                                                            | -                                        |
| Gan-2017             | NCT01991821, NCT01991860 (US Phase)               | retrospective                          | unclear                                                                                        | -                                        |
| Gomez-Hernandez-2010 | NCT01116713                                       | retrospective                          | unclear                                                                                        | -                                        |
| Green-2012           | NCT00717054,                                      | prospective                            | high                                                                                           | 2                                        |

|                        |                                                |                                                                            |                                                                                                |   |
|------------------------|------------------------------------------------|----------------------------------------------------------------------------|------------------------------------------------------------------------------------------------|---|
|                        | NCT00659737                                    |                                                                            |                                                                                                |   |
| Habib-2011             | NCT00734929                                    | retrospective                                                              | unclear                                                                                        | - |
| Hemmati-2014           | IRCT2014062118168N1                            | retrospective                                                              | unclear                                                                                        | - |
| Hessami-2012           | IRCT138903033939N1                             | retrospective                                                              | unclear                                                                                        | - |
| Hu-2017                | ChiCTR-IPR-15005852                            | prospective                                                                | high                                                                                           | 2 |
| Joo-2015               | NCT01639599                                    | retrospective                                                              | unclear                                                                                        | - |
| Joo-2016               | KCT0000688                                     | retrospective                                                              | unclear                                                                                        | - |
| Jung-2013              | NCT01440673                                    | retrospective                                                              | unclear                                                                                        | - |
| Kakuta-2011            | JPRN-UMIN000003850                             | prospective                                                                | unclear (the study does not declare its primary outcome)                                       | - |
| Kakuta-2015            | UMIN000012999                                  | prospective                                                                | unclear (either protocol or study article provides no information about the "time assessment") | - |
| Kim-2015               | KCT0000183                                     | unclear due to contradictory registration data (assessed as retrospective) | -                                                                                              | - |
| Kim-SH-2013            | NCT01169805                                    | prospective                                                                | high                                                                                           | 2 |
| Kim-WJ-2013            | ACTRN12612000757819                            | retrospective                                                              | unclear                                                                                        | - |
| Kizilcik-2017          | NCT02382146                                    | retrospective                                                              | unclear                                                                                        | - |
| Ko-iam-2015            | TCTR20140128001                                | retrospective                                                              | unclear                                                                                        | - |
| Koyuncu-2017           | NCT02296333                                    | retrospective                                                              | unclear                                                                                        | - |
| Kranke-2012            | NCT00895830                                    | prospective                                                                | low                                                                                            | - |
| Kranke-2013            | NCT01510704,<br>EUCTR2011-004267-71            | prospective                                                                | low                                                                                            | - |
| Kurz-2015              | NCT00273377                                    | retrospective                                                              | unclear                                                                                        | - |
| Lee-WS-2015            | NCT01752374                                    | retrospective                                                              | unclear                                                                                        | - |
| Mathiesen-2009         | NCT00209495                                    | retrospective                                                              | unclear                                                                                        | - |
| Mathiesen-2011         | NCT00378547                                    | retrospective                                                              | unclear                                                                                        | - |
| Murphy-2014            | NCT01545700                                    | retrospective                                                              | unclear                                                                                        | - |
| NCT00888329            | NCT00888329                                    | retrospective                                                              | unclear                                                                                        | - |
| Nielsen-2015           | NCT01953978                                    | retrospective                                                              | unclear                                                                                        | - |
| NKO101287              | (Pro) EUCTR2004-001021-22, (Retro) NCT00600990 | pro and retrospective                                                      | low                                                                                            | - |
| NKT102245              | (Pro) NCT00274690, (Retro) EUCTR2004-000369-37 | pro and retrospective                                                      | low                                                                                            | - |
| NKT102260              | EUCTR2004-000370-31, NCT00108095               | retrospective                                                              | unclear                                                                                        | - |
| NKT102552              | EUCTR2005-005855-16-BE                         | prospective                                                                | low                                                                                            | - |
| PALO-04-07             | EUCTR2005-000298-23                            | prospective                                                                | low                                                                                            | - |
| Park-2013              | NCT01476280                                    | retrospective                                                              | unclear                                                                                        | - |
| Rettori-2011           | NCT00888303                                    | retrospective                                                              | unclear                                                                                        | - |
| Ryoo-2015              | KCT0000581                                     | retrospective                                                              | unclear                                                                                        | - |
| Ryu-2013               | KCT0000267                                     | retrospective                                                              | unclear                                                                                        | - |
| Sanchez-Rodriguez-2010 | NCT01030614                                    | retrospective                                                              | unclear                                                                                        | - |
| Segelman-2016          | EUCTR2009-014717-27                            | prospective                                                                | unclear (either protocol or                                                                    | - |

|                |                     |               |                                                                                                |   |
|----------------|---------------------|---------------|------------------------------------------------------------------------------------------------|---|
|                |                     |               | study article provides no information about the "time assessment")                             |   |
| Singla-2010    | NCT00108095         | retrospective | unclear                                                                                        | - |
| Sinha-2014     | NCT00956215         | prospective   | high                                                                                           | 1 |
| Soga-2015      | JPNR-UMIN000007613  | prospective   | high                                                                                           | 2 |
| Song-2017      | NCT02480088         | retrospective | unclear                                                                                        | - |
| Tarantino-2015 | NCT01189292         | prospective   | low                                                                                            | - |
| Tolver-2012    | NCT01170780         | prospective   | low                                                                                            | - |
| Tsutsumi-2014  | JPNR-UMIN000008621  | prospective   | unclear (either protocol or study article provides no information about the "time assessment") | - |
| Vallejo-2012   | NCT00659945         | prospective   | high                                                                                           | 1 |
| Worni-2008     | NCT00619086         | retrospective | unclear                                                                                        | - |
| Yang-2015      | NCT02096835         | retrospective | unclear                                                                                        | - |
| Yang-2017      | NCT02039427         | prospective   | high                                                                                           | 1 |
| Zhou-2012      | ChiCTR-TRC-09000558 | prospective   | high                                                                                           | 2 |
