# Supplementary material for: Trial registration and selective outcome reporting in 585 clinical trials investigating drugs for prevention of postoperative nausea and vomiting
Source: PubMed Central journal article supplement (PMC8524993; doi:10.1186/s12871-021-01464-w), 2021-10-19
Supplement: 12871_2021_1464_MOESM4_ESM.pdf [file 12871_2021_1464_MOESM4_ESM.pdf]

**Supplementary File 4:** List of journals publishing registered trials (n = 75), with date of adopting the ICMJE policy.

| Journal                                     | Total (n=75) | list date (M/D/Y) of including ICMJE policy on prospective registration | Publication before or in the year of the list date (n) / *(number of prospective registrations) | Publication after list date (n) / *(number of prospective registrations) |
|---------------------------------------------|--------------|-------------------------------------------------------------------------|-------------------------------------------------------------------------------------------------|--------------------------------------------------------------------------|
| Acta Anaesthesiologica Scandinavica         | 2/75 (2.6%)  | 1/1/2010 <sup>§</sup>                                                   | 1                                                                                               | 1                                                                        |
| Aesthetic Plastic Surgery                   | 1/75 (1.3%)  | 7/16/18*                                                                | 1                                                                                               | 0                                                                        |
| American Journal of Therapeutics            | 1/75 (1.3%)  | NA                                                                      | na                                                                                              | na                                                                       |
| Anesthesia & Analgesia                      | 4/75 (5.3%)  | 3/3/16*                                                                 | 4 / *(1)                                                                                        | 0                                                                        |
| Anesthesiology                              | 2/75 (2.6%)  | 5/1/2013 <sup>§</sup>                                                   | 1                                                                                               | 1                                                                        |
| Anesthesiology and Pain Medicine            | 1/75 (1.3%)  | 9/12/11*                                                                | 0                                                                                               | 1                                                                        |
| Annals of Surgery                           | 2/75 (2.6%)  | 7/1/2007 <sup>§</sup>                                                   | 0                                                                                               | 2 / *(1)                                                                 |
| Archives of Surgery                         | 1/75 (1.3%)  | NA                                                                      | na                                                                                              | na                                                                       |
| BioMed Research International               | 1/75 (1.3%)  | NA                                                                      | na                                                                                              | na                                                                       |
| BMC Anesthesiology                          | 3/75 (4.0%)  | pro/retro #                                                             | na                                                                                              | na                                                                       |
| BMC Cancer                                  | 1/75 (1.3%)  | pro/retro #                                                             | na                                                                                              | na                                                                       |
| British Journal of Anaesthesia              | 8/75 (10.6%) | 1/1/2009 <sup>§</sup>                                                   | 1                                                                                               | 7 / *(4)                                                                 |
| British Journal of Surgery                  | 1/75 (1.3%)  | wo date                                                                 | na                                                                                              | na                                                                       |
| Drug Design, Development and Therapy        | 1/75 (1.3%)  | 9/4/14*                                                                 | 0                                                                                               | 1 / *(1)                                                                 |
| European Journal of Anaesthesiology         | 2/75 (2.6%)  | 1/1/2015 <sup>§</sup>                                                   | 0                                                                                               | 2 / *(1)                                                                 |
| European Journal of Cancer Care             | 1/75 (1.3%)  | pro/retro #                                                             | na                                                                                              | na                                                                       |
| European Journal of Cardio-Thoracic Surgery | 1/75 (1.3%)  | 3/24/14*                                                                | 0                                                                                               | 1 / *(1)                                                                 |
| European Journal of Clinical Pharmacology   | 1/75 (1.3%)  | 12/20/16*                                                               | 1 / *(1)                                                                                        | 0                                                                        |
| Frontiers in Medicine                       | 1/75 (1.3%)  | 5/27/15*                                                                | 0                                                                                               | 1                                                                        |
| Head & Neck                                 | 1/75 (1.3%)  | NA                                                                      | na                                                                                              | na                                                                       |
| Indian Journal of Anaesthesia               | 1/75 (1.3%)  | 5/29/18*                                                                | 1                                                                                               | 0                                                                        |
| International Journal of Surgery            | 1/75 (1.3%)  | 3/10/15*                                                                | 1                                                                                               | 0                                                                        |
| Iranian Journal of Medical Sciences         | 1/75 (1.3%)  | 1/19/10*                                                                | 0                                                                                               | 1                                                                        |

|                                                           |             |                        |          |          |
|-----------------------------------------------------------|-------------|------------------------|----------|----------|
| Journal of Anesthesia                                     | 6/75 (8.0%) | 4/1/2013 <sup>§</sup>  | 1        | 5 / *(3) |
| Journal of Babol University of Medical Sciences           | 1/75 (1.3%) | NA                     | na       | na       |
| Journal of Clinical Anesthesia                            | 2/75 (2.6%) | NA                     | na       | na       |
| Journal of International Medical Research                 | 1/75 (1.3%) | pro/retro <sup>#</sup> | na       | na       |
| Journal of Neurosurgical Anesthesiology                   | 1/75 (1.3%) | wo date <sup>§</sup>   | na       | na       |
| Journal of the Medical Association of Thailand            | 2/75 (2.6%) | 4/10/19*               | 2        | 0        |
| Korean Journal of Anesthesiology                          | 4/75 (5.3%) | 7/27/17*               | 4 / *(2) | 0        |
| Minerva Chirurgica                                        | 1/75 (1.3%) | NA                     | na       | na       |
| Obesity Surgery                                           | 2/75 (2.6%) | 7/16/18*               | 2 / *(1) | 0        |
| Pain                                                      | 1/75 (1.3%) | 8/19/15*               | 1        | 0        |
| Plastic and Reconstructive Surgery                        | 1/75 (1.3%) | 6/2/20*                | 1 / *(1) | 0        |
| PLOS ONE                                                  | 1/75 (1.3%) | pro/retro <sup>#</sup> | na       | na       |
| Rawal Medical Journal                                     | 1/75 (1.3%) | NA                     | na       | na       |
| Surgical Endoscopy                                        | 1/75 (1.3%) | 7/2/20*                | 1        | 0        |
| Surgical Laparoscopy, Endoscopy & Percutaneous Techniques | 1/75 (1.3%) | NA                     | na       | na       |
| The Journal of Medical Investigation                      | 1/75 (1.3%) | NA                     | na       | na       |
| The New England Journal of Medicine                       | 1/75 (1.3%) | 7/1/2008 <sup>§</sup>  | 1        | 0        |
| World Journal of Surgery                                  | 2/75 (2.6%) | pro/retro <sup>#</sup> | na       | na       |
| no journal publication (Clinical Study Report)            | 6/75 (8.0%) | na                     | na       | na       |

NA (not available), na (not applicable), wo date (without date; the journal endorses trial registration, but does not indicate a date of including ICMJE policy)

\*<http://www.icmje.org/journals-following-the-icmje-recommendations/> (assessed 8/13/2020)

<sup>§</sup>information provided on the journal's home page

<sup>#</sup>pro/retro: The journal requires that clinical trials are prospectively registered in a publicly accessible database. If the trial is not registered, or was registered retrospectively, the reasons for this should be explained (and justifiable).
